# Supplementary material for: Azima tetracantha Leaf Methanol Extract Inhibits Gastric Cancer Cell Proliferation through Induction of Redox Imbalance and Cytochrome C Release
Source: MDPI journal article supplement (doi:10.3390/app12010120), 2021-12-23
Supplement: s1 [file s1]

**Supplementary Material S1** Composition of the polyphenols in methanolic extract of *Azima tetracantha* leaves analyzed by LC-MS

| Sl. No. | Retention time (mins) | Compounds identified            |
|---------|-----------------------|---------------------------------|
| 1       | 2.6                   | Ferulic acid                    |
| 2       | 4.2                   | p-Coumaric acid                 |
| 3       | 5.5                   | Hydroxycinnamic acid derivative |
| 4       | 6.7                   | 4-Hydroxycinnamic acid          |
| 5       | 8.9                   | 7-O-methyl quercetin            |
| 6       | 10.2                  | Methyl-O-quercetin glucoside    |
| 7       | 11.6                  | Quercetin 3-O-glucoside         |
| 8       | 16.3                  | Myricetin-3-O-rutinoside        |
| 9       | 19.7                  | Quercetin                       |
| 10      | 24.2                  | Isorhamnetin 3-O-glucoside      |

The data was taken from our previous publication (<https://doi.org/10.1016/j.sjbs.2021.07.090>) via licence number 5161810868726

**Supplementary Material S2:** The effect of *Azima tetracantha* extract alone treatment (a), *A. tetracantha* co-treated with glutathione biosynthesis inhibitor- buthionine sulfoximine (BSO) on the cell death induced by *Azima tetracantha* extract (b).

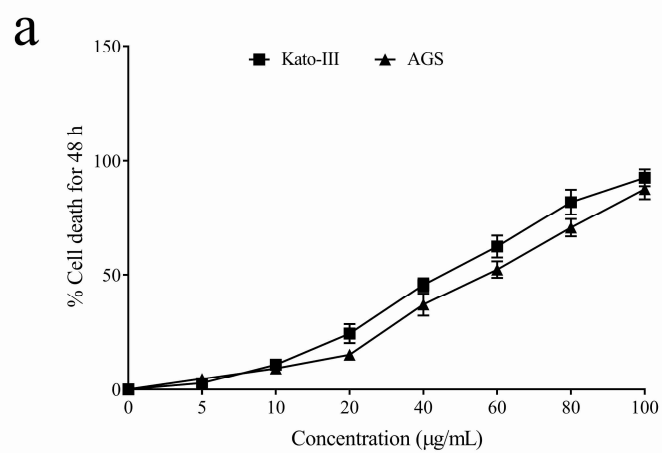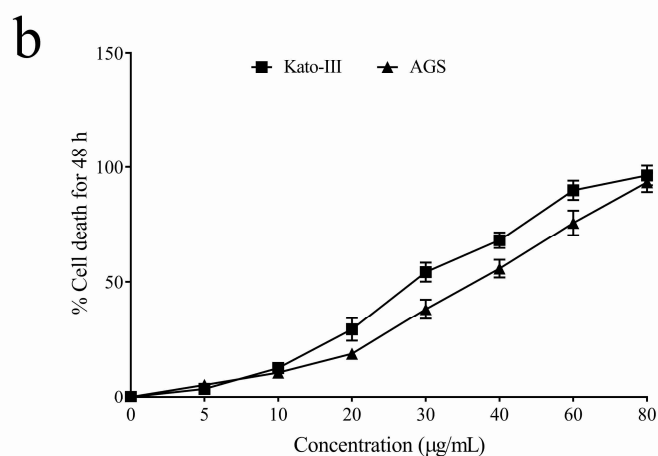

**Supplementary material S3.** The comparison of % cell death at individual doses of Azima tetracantha extract treated cells; the comparison was made with the non-cancerous cell (HEK293) to the AGS and Kato-III cells.

| Dose | % Cell death |               |               |
|------|--------------|---------------|---------------|
|      | HEK293       | AGS           | Kato-III      |
| 5    | 1.44± 0.7    | 4.7± 0.8**    | 2.8± 0.2*     |
| 10   | 2.04± 1.1    | 9.3± 2.2***   | 10.9± 2.1***  |
| 20   | 6.33± 0.9    | 15.2± 2.2***  | 24.33± 4.1*** |
| 40   | 16.2± 2.4    | 36.91± 4.8*** | 45.56± 2.9*** |
| 60   | 25.3± 1.6    | 52.26± 3.6*** | 62.36± 4.8*** |
| 80   | 33.2± 1.4    | 70.65± 3.8*** | 81.92± 5.5*** |
| 100  | 43.67± 4.3   | 87.6± 4.5***  | 92.55± 3.7*** |

**Supplementary material S4.** The effect of *Azima tetracantha* extract alone treatment and the BSO co-treatment on the cell death of Kato-III and AGS cells

| Dose<br>( $\mu\text{g/mL}$ ) | Kato-III Cells  |                         | Statistical<br>significance |
|------------------------------|-----------------|-------------------------|-----------------------------|
|                              | A. tetracantha  | A. tetracantha +<br>BSO |                             |
| 0                            | 0               | 0                       | ns                          |
| 5                            | 2.8 $\pm$ 0.2   | 3.49 $\pm$ 0.1          | ns                          |
| 10                           | 10.9 $\pm$ 2.1  | 12.48 $\pm$ 1.77        | ns                          |
| 20                           | 24.33 $\pm$ 4.1 | 29.16 $\pm$ 4.9         | ns                          |
| 40                           | 45.56 $\pm$ 2.9 | 68.22 $\pm$ 3.4         | **                          |
| 60                           | 62.36 $\pm$ 4.8 | 89.9 $\pm$ 4.2          | ***                         |
| 80                           | 81.92 $\pm$ 5.5 | 96.33 $\pm$ 4.29        | ****                        |
| AGS cells                    |                 |                         |                             |
| Dose<br>( $\mu\text{g/mL}$ ) | A. tetracantha  | A. tetracantha +<br>BSO | Statistical<br>significance |
| 0                            | 0               | 0                       | ns                          |
| 5                            | 5.2 $\pm$ 0.4   | 4.7 $\pm$ 0.8           | ns                          |
| 10                           | 10.5 $\pm$ 2.1  | 9.3 $\pm$ 2.2           | ns                          |
| 20                           | 18.6 $\pm$ 2.2  | 15.2 $\pm$ 2.2          | ns                          |
| 40                           | 37.99 $\pm$ 4.2 | 52.26 $\pm$ 3.6         | ***                         |
| 60                           | 55.83 $\pm$ 3.9 | 70.65 $\pm$ 3.8         | ***                         |
| 80                           | 75.83 $\pm$ 5.3 | 87.6 $\pm$ 4.5          | ****                        |
